# Supplementary material
Source: PubMed Central journal article supplement (PMC2872479)
Supplement: NIHMS177065-supplement-01.pdf [file NIHMS177065-supplement-01.pdf]

1  
2  
3  
4 **Supplementary Figures:**  
5  
6  
7

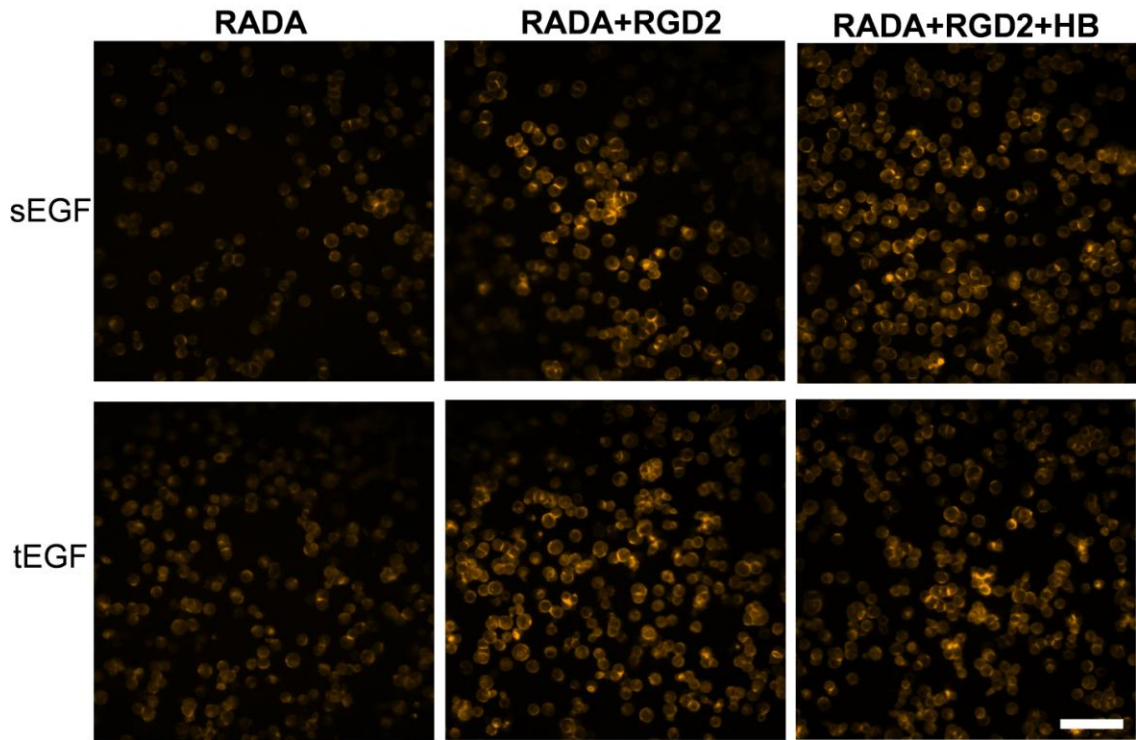

33  
34 **Figure S1: Hepatocyte morphology on self-assembling peptide gels functionalized with adhesion ligands and tethered growth factor 4 hours after initial plating.**  
35 Representative fluorescent actin cytoskeleton images (10 X objective) for hepatocytes on  
36 RADA, RADA+RGD2, RADA+RGD2+HB peptide gels with soluble EGF or tEGF, 4  
37 hours after initial seeding (Scale bar = 150  $\mu$ m).  
38  
39  
40  
41  
42  
43  
44  
45  
46  
47  
48  
49  
50  
51  
52  
53  
54  
55  
56  
57  
58  
59  
60  
61  
62  
63  
64  
65

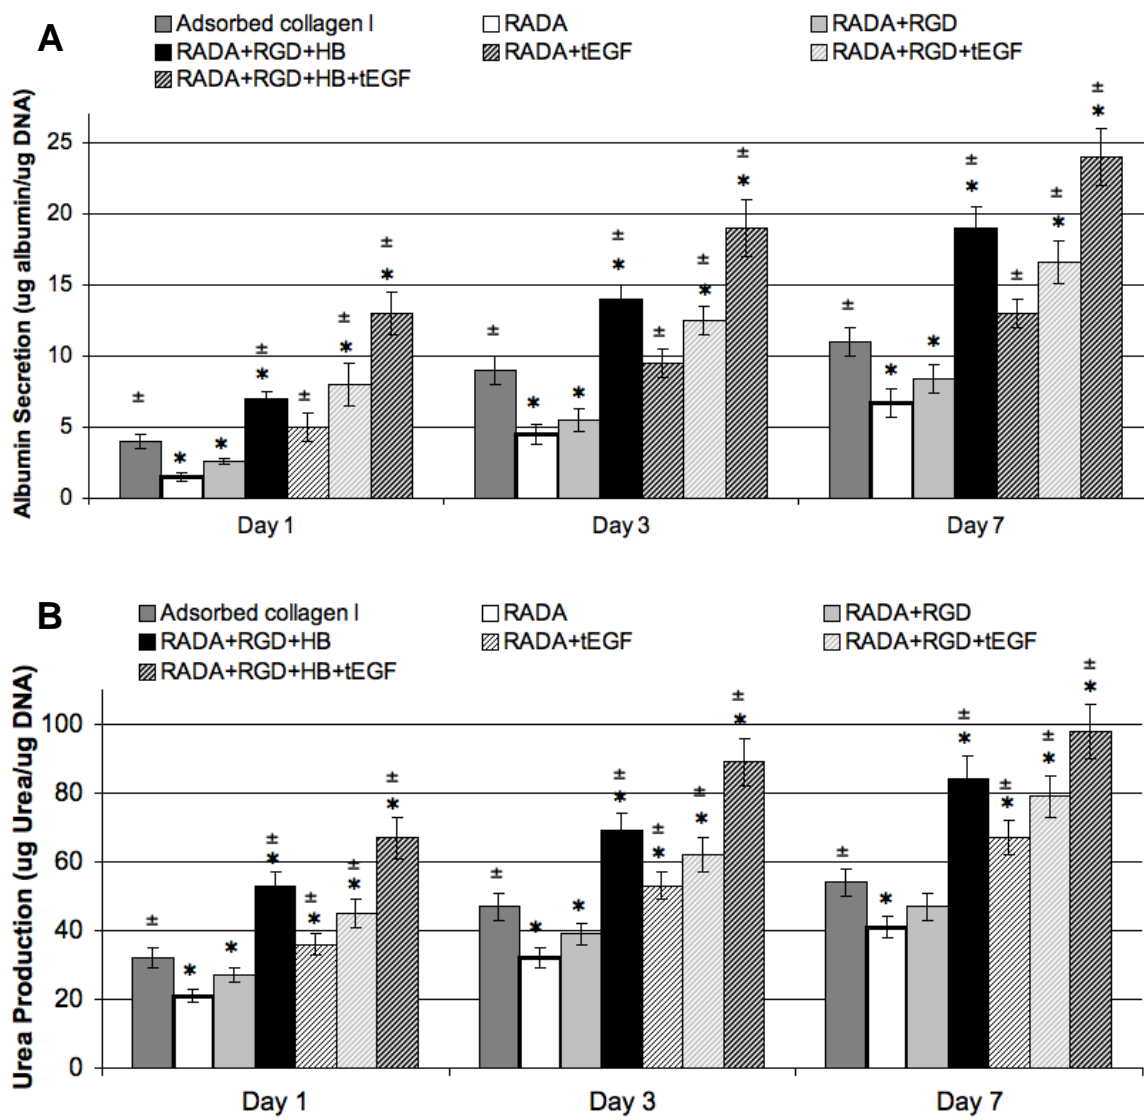

**Figure S2: Maintenance of metabolic function improves with functionalization of peptide gels with adhesion ligands and growth factor tethering.** A) Albumin secretion rate, B) Urea production rate, expressed as  $\mu\text{g protein}/\mu\text{g DNA}$  and normalized to initial plating cell density. Conditioned media from hepatocyte cultures on peptide gels and adsorbed collagen I (seeded at  $100,000 \text{ cells}/\text{cm}^2$ ) were collected, and urea and albumin were quantified using standard assay kits. Culture medium was replaced 48 hours prior to collection on the indicated days. Samples, standards and controls were tested in duplicates.  $\pm$  indicates statistically significant difference from RADA,  $p < 0.05$ ,  $n > 3$ , \* indicates statistically significant difference from adsorbed collagen I,  $p < 0.05$ ,  $n > 3$ .
